# Supplementary material for: Oncolytic Effect of Zika Virus in Neuroendocrine Pancreatic Tumors: New Perspectives for Therapeutic Approaches
Source: MDPI journal article supplement (doi:10.3390/ijms242417271), 2023-12-08
Supplement: s1 [file s1]

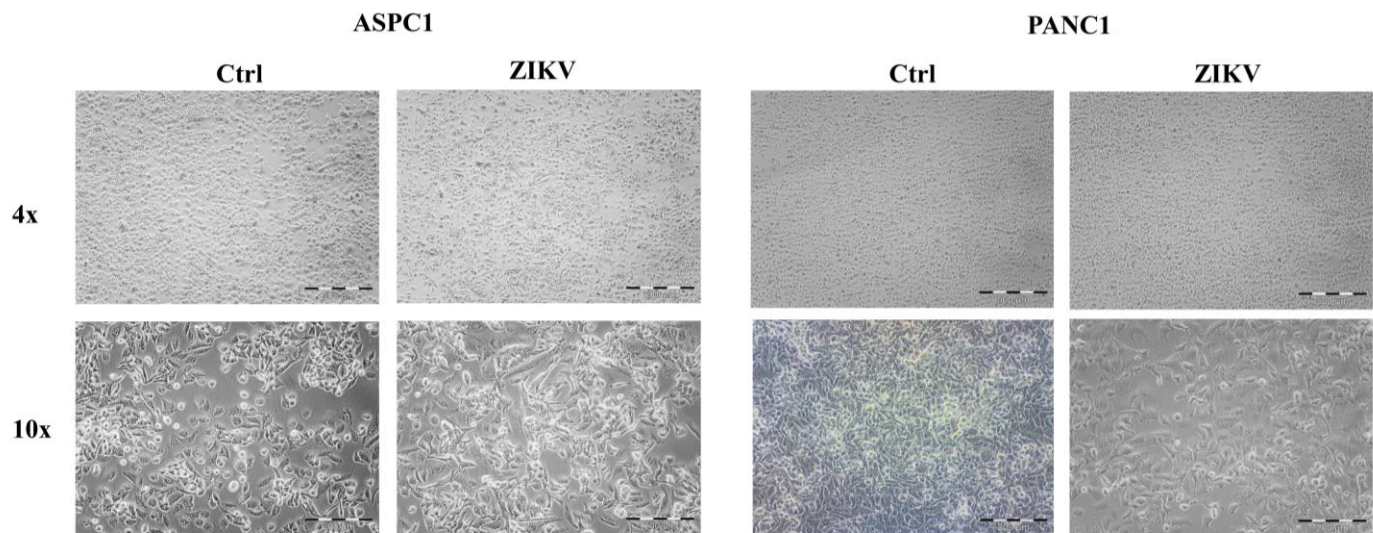

**Figure S1.** Morphological evaluation of ASPC1 and PANC1 control (Ctrl) and Zika-infected cells (ZIKV) in bright field microscopy (4X and 10X magnification). After infection, the cell morphology did not change, and the cellular density appeared uniform.

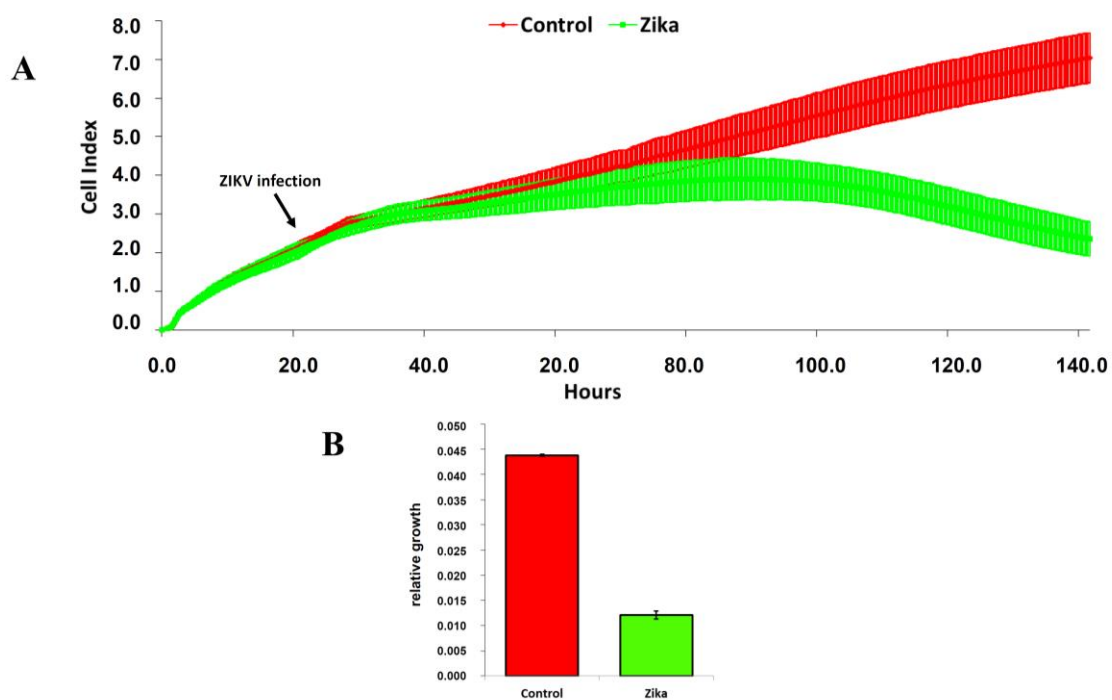

**Figure S2.** MIN6 growth curve obtained by xCELLigence system. (A) 21 hours after plating the cells were infected (black arrow) with ZIKV (green) vs. control (non-infected cells, red). The impedance was measured every 15 minutes. (B) Growth curves were quantified during the following 119 hours after treatment through the following formula: relative growth = slope x time + intercept (p value  $\leq 0.05$ ).

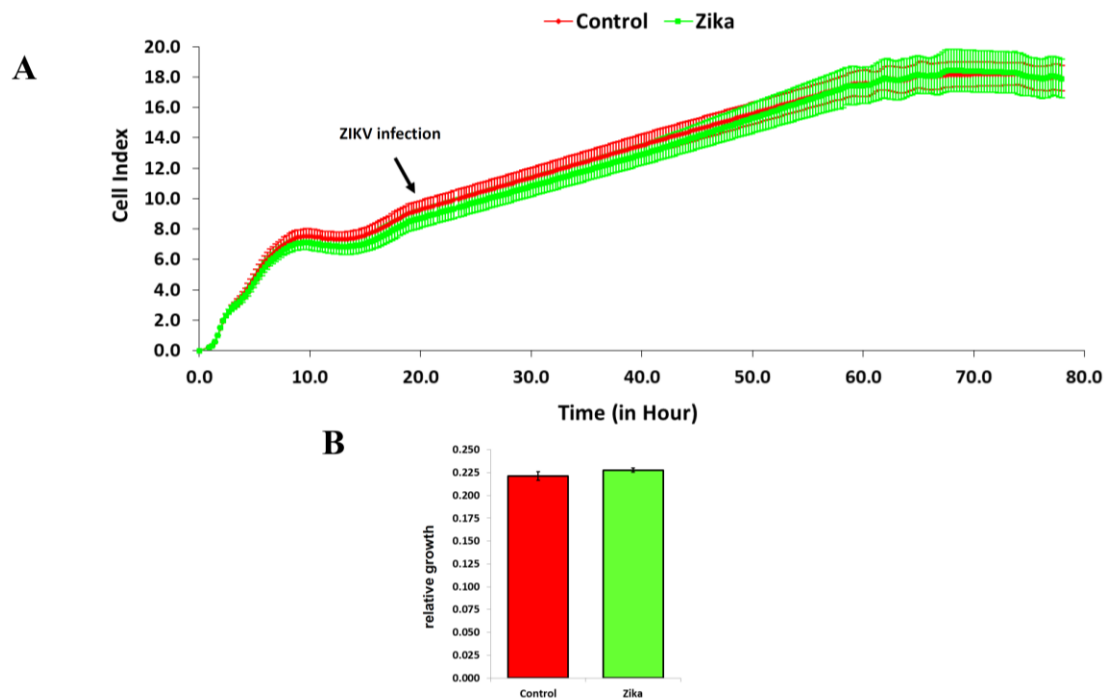

**Figure S3.** PANC1 growth curve obtained by xCELLigence system. (A) 21 hours after plating the cells were infected (black arrow) with ZIKV (green) vs. control (non-infected cells, red). The impedance was measured every 15 minutes. (B) Growth curves were quantified during the following 80 hours after treatment through the following formula: relative growth = slope  $\times$  time + intercept (p value  $\leq 0.05$ ).

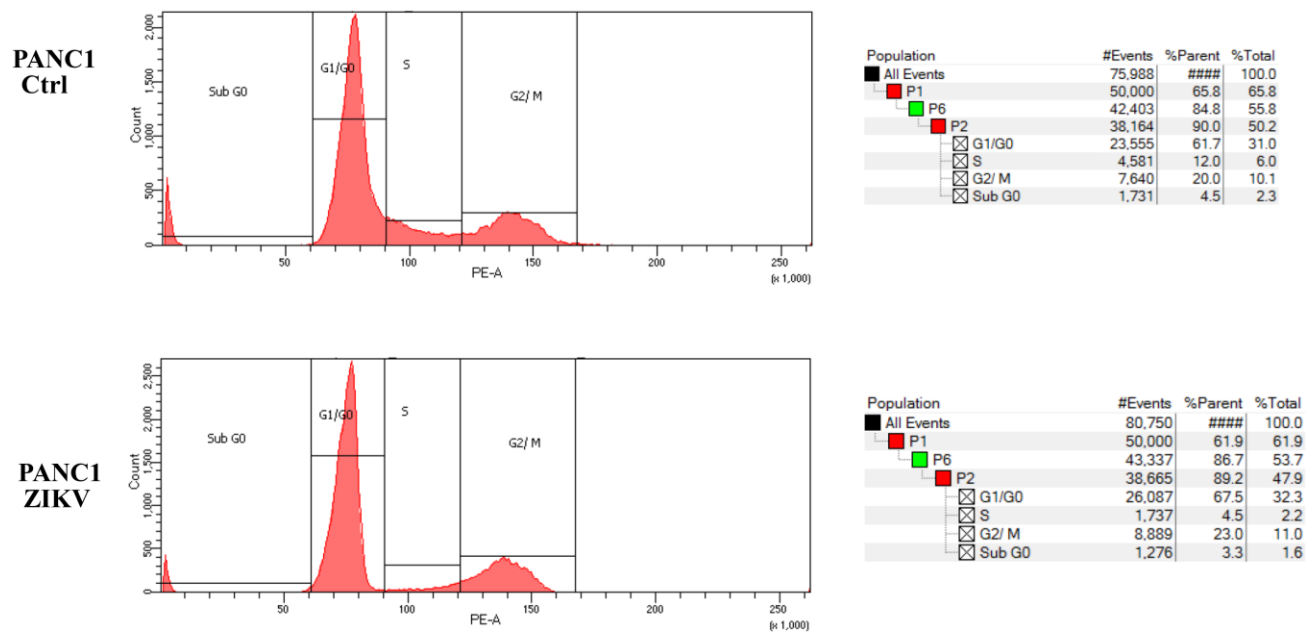

**Figure S4.** Propidium iodide cell cycle (PI) FACS analysis of Zika-infected PANC1 vs. control (one representative experiment is shown).
